# Supplementary material
Source: PubMed Central journal article supplement (PMC4022183)

# SUPPLEMENTARY MATERIAL

## Evaluation of structural effects on 5-HT<sub>2A</sub> receptor antagonism by aporphines: identification of a new aporphine with 5-HT<sub>2A</sub> antagonist activity

Shashikanth Ponnala<sup>a</sup>, Junior Gonzales<sup>a,b</sup>, Nirav Kapadia<sup>a,b</sup>, Hernan A. Navarro<sup>c</sup> and Wayne W. Harding<sup>a,b\*</sup>

<sup>a</sup>Chemistry Dept., Hunter College, CUNY, 695 Park Avenue, NY 10065, USA

<sup>b</sup>The Graduate Center, City University of New York, 365 5<sup>th</sup> Ave., NY 10016, USA

<sup>c</sup>Center for Organic and Medicinal Chemistry, Research Triangle Institute, Research Triangle Park, NC 27709, USA.

| CONTENTS                                                                                          | PAGE |
|---------------------------------------------------------------------------------------------------|------|
| General Experimental Procedures                                                                   | 2    |
| Synthesis of Compound <b>6</b>                                                                    | 2    |
| Synthesis of Compound <b>7</b>                                                                    | 2    |
| Synthesis of Compound <b>8</b>                                                                    | 3    |
| Synthesis of Compound <b>9</b>                                                                    | 3    |
| Synthesis of Compound <b>10</b>                                                                   | 4    |
| Synthesis of Compound <b>11</b>                                                                   | 4    |
| Synthesis of Compound <b>13</b>                                                                   | 4    |
| General procedure for LAH reduction: Synthesis of Compounds <b>12a</b> , <b>12b</b> and <b>14</b> | 5    |
| Synthesis of Compounds <b>15a-15c</b>                                                             | 5    |
| Receptor Assays                                                                                   | 6    |
| <sup>1</sup> H and <sup>13</sup> C NMR spectral data for all analogs                              | 7-22 |

---

\* Corresponding author. Tel.: +212-772-5359; fax: +212-772-5332; e-mail: whardi@hunter.cuny.edu

## General Experimental Procedures

All glass apparatus were oven dried prior to use. A CEM Discover microwave reactor was used to carry out all direct arylation reactions.  $^1\text{H}$  NMR and  $^{13}\text{C}$  NMR spectra were recorded using Bruker DPX-500 spectrometer (operating at 500 MHz for  $^1\text{H}$ ; 125 MHz respectively for  $^{13}\text{C}$ ) using  $\text{CDCl}_3$  as solvent. Tetramethylsilane ( $\delta$  0.00 ppm) served as an internal standard in  $^1\text{H}$  NMR and  $\text{CDCl}_3$  ( $\delta$  77.0 ppm) in  $^{13}\text{C}$  NMR as solvent unless stated otherwise. Reactions were monitored by TLC with Whatman Flexible TLC silica gel G/UV 254 precoated plates (0.25 mm). TLC plates were visualized by UV (254 nm) and by staining with vanillin spraying reagent (2 gm vanillin in 1 L of 10%  $\text{H}_2\text{SO}_4$ ) followed by heating. Flash column chromatography was performed with silica gel 60 (EMD Chemicals, 230-400 mesh, 0.04-0.063  $\mu\text{m}$  particle size). All chemicals and reagents were obtained from Sigma-Aldrich and Fischer Scientific (USA) and were used without further purification.

## Synthesis of Compound 6

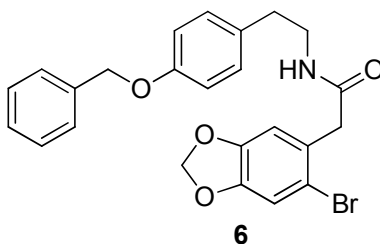

A solution of acid **5** (5.1 mmol) and 1,1'-carbonyldiimidazole (CDI, 4.6 mmol) in anhydrous tetrahydrofuran (THF, 40 mL) was stirred at 0 °C for 1.5 h and then at room temperature for 1 h. The mixture was cooled in an ice-bath and stirred for 1 h. 4-methoxyphenethylamine **4** (4.6 mmol) was then added and the solution was stirred at 0 °C for 4 h and stirred overnight at room temperature. The reaction mixture was evaporated under reduced pressure and the residue was dissolved in ethyl acetate and extracted with 1 N HCl (25 mL), washed sequentially with water (50 mL), saturated  $\text{NaHCO}_3$  solution (25 mL), water (50 mL), and finally with brine (50 mL). The organic layer was dried over anhydrous  $\text{Na}_2\text{SO}_4$  and concentrated under reduced pressure. The crude product was crystallized from ethyl acetate/diethylether to furnish amide **6** as a white solid (80% yield).

## Synthesis of Compound 7

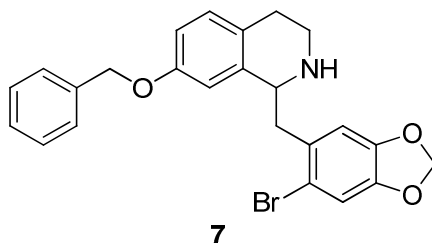

To a stirred solution of amide **6** (2.2 mmol) and pyridine (0.8 mL) in dichloromethane (DCM, 7 mL) was added trifluoromethanesulfonic acid dropwise at -78 °C under argon atmosphere. The reaction mixture was stirred at -78 °C for

30 minutes and warmed to room temperature. The reaction mixture was transferred in to a separatory funnel and washed with aqueous HCl (10 mL, 1M) followed by brine (15 mL). The DCM layer was dried over anhydrous  $\text{Na}_2\text{SO}_4$ , filtered and evaporated to dryness to yield a crude imine, which was used further without any purification. To a magnetically stirred ice-cooled solution of this crude imine in a mixture of dry methanol (MeOH, 20 mL) and dry DCM (20 mL), was added powdered sodium borohydride ( $\text{NaBH}_4$ , 11.5 mmol) in three portions over 10 min. The reaction mixture was stirred at 0 °C for 2 h. The mixture was diluted with water and extracted with DCM (3 × 20 mL). The combined organic layer was washed with brine (10 mL), dried over anhydrous  $\text{Na}_2\text{SO}_4$ , and concentrated *in vacuo*. The crude product was purified by flash column chromatography over deactivated silica gel using 0.7% MeOH/DCM as eluant to furnish pure **7** as a white solid (88% yield).

### Synthesis of Compound 8

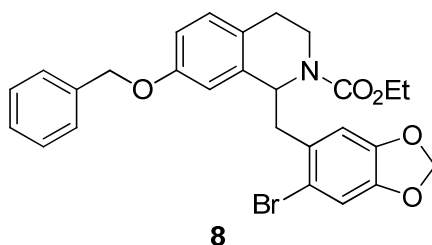

To a solution of compound **7** (1 mmol) dissolved in dry DCM (25 mL) was added ethyl chloroformate (1 mmol), and potassium carbonate (1.63 mmol) at room temperature. The reaction mixture was stirred at room temperature for 12 h, quenched with saturated  $\text{NH}_4\text{Cl}$  solution (10 mL), and extracted with DCM (3 × 20 mL). The organic layer was washed with water (10 mL), dried over anhydrous  $\text{Na}_2\text{SO}_4$  and concentrated under reduced pressure. The resultant crude product, was purified via column chromatography over silica gel using ethyl acetate/hexanes (20:80) as eluant. This furnished **8** as a viscous oil (85% yield).

### Synthesis of Compound 9

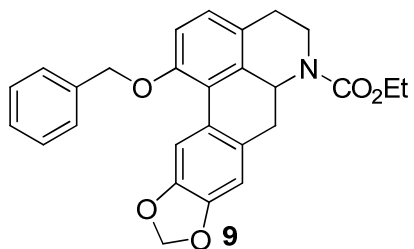

In a 5 mL microwave reaction vial, compound **8** (0.1 mmol),  $\text{Pd}(\text{OAc})_2$  (0.02 mmol), di-*tert*-butyl(methyl)phosphonium tetrafluoroborate, (0.04 mmol) and  $\text{K}_2\text{CO}_3$  (0.30 mmol) were added and dissolved in Argon-purged anhydrous DMSO (0.5 mL). The mixture was irradiated in a CEM Discover microwave reactor for 6 min at 130 °C with the power level at 300 W. After cooling to room temperature, the reaction mixture was loaded directly onto a deactivated silica gel column and eluted with 10% ethyl acetate/hexanes to furnish compound **9** as a white solid (50% yield).

### Synthesis of Compound 10

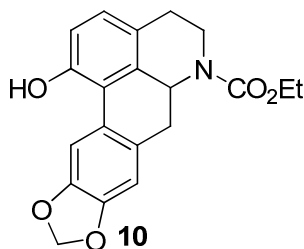

To a solution of compound **9** (1 mmol) in dry methanol (10 mL) was added 10% Pd/C (25 mg) under inert atmosphere. The reaction was purged with H<sub>2</sub> and stirred under a balloon of H<sub>2</sub> for 8 h. 10% Pd/C was filtered through a celite pad and the filtrate was evaporated to give the corresponding phenol **10** as a white solid (95% yield).

### Synthesis of Compound 11

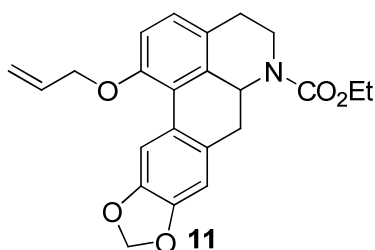

To a stirred solution of phenol (1 mmol) in acetonitrile (10 mL) was added solid K<sub>2</sub>CO<sub>3</sub> (2 mmol) and potassium iodide (2 mmol) at room temperature. The resulting mixture was stirred for 5 min and then allyl bromide (1.5 mmol) was added and refluxed for 6 h. The solvent was evaporated and the resulting solid dissolved in water and extracted with dichloromethane twice (20 mL each). The organic layer was dried over anhydrous sodium sulfate and concentrated under reduced pressure. The crude product was purified by flash column chromatography using 12.5% ethyl acetate/hexanes (60-70% yield).

### Synthesis of Compound 13

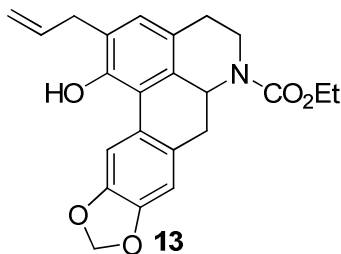

In a 5 mL microwave reaction vial, compound **11** (0.5 mmol) was dissolved in *N,N*-diethylaniline (2 mL). The mixture was irradiated in the CEM Discover microwave reactor for 6 min at 215 °C with the power level at 300 W. After cooling to room temperature, the reaction mixture was washed with 1N HCl (5 mL) and extracted with DCM (10 mL). The crude

mixture was then loaded directly onto a silica gel column and eluted with 10% acetone/hexanes to furnish compound **13** (90% yield).

### General procedure for LAH reduction: Synthesis of Compounds **12a**, **12b** and **14**

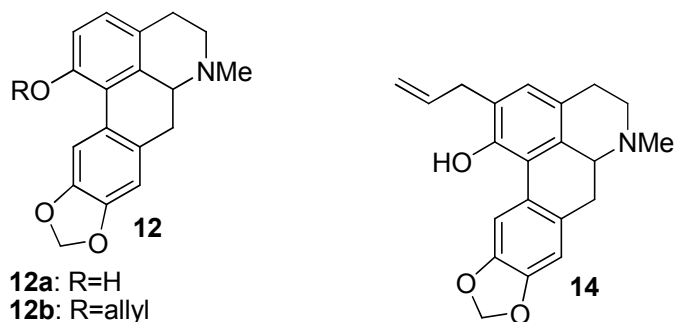

To a stirred suspension of LAH (10 mmol) in dry THF at 0 °C under inert atmosphere was added a solution of the carbamate (**10**, **11** or **13**; 1 mmol) in THF (5 mL) dropwise. After stirring at room temperature for 30 min, the reaction mixture was heated to reflux for 3 h and then cooled to 0 °C. The mixture was then quenched by dropwise addition of water (0.5 mL) followed by addition of 10% aqueous NaOH (1 mL). The reaction mixture was filtered through a pad of celite and the residue washed with THF (5 mL). The filtrate was evaporated under reduced pressure to provide the crude product, which was re-dissolved in DCM. The organic layer was washed sequentially with water (10 mL) and brine (10 mL), dried over Na<sub>2</sub>SO<sub>4</sub>, filtered and concentrated *in vacuo*. The residue was purified by flash column chromatography on silica gel with gradient elution in 5% MeOH/DCM (50% yield for **12a** from **10**; 60 % yield for **12b** from **11**; 54% yield for **14** from **13**).

### Synthesis of Compounds **15a-15c**

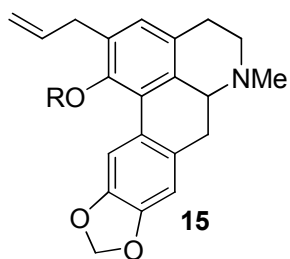

**15a**: R = methyl  
**15b**: R = allyl  
**15c**: R=cyclopropylmethyl

To a stirred solution of allylated phenol **13** (1 mmol) in acetone (10 mL) was added solid K<sub>2</sub>CO<sub>3</sub> (2 mmol) and potassium iodide (2 mmol) at room temperature. The mixture was stirred for 5 min and the corresponding alkyl bromide (1.5 mmol) was added and refluxed for 7 h. The solvent was evaporated and the resulting solid dissolved in water and extracted with dichloromethane twice (20 mL each). The organic layer was dried over sodium sulfate and concentrated under reduced pressure. The crude product was purified by flash column chromatography eluting in 10-30% ethyl acetate/hexanes. The resulting crude product was added to a suspension of LAH (10 mmol) in THF (25 mL) at 0 °C and heated at reflux for 6 h. After the usual workup (see general procedure for LAH reduction above), the crude compound was purified via flash

column chromatography on a silica gel column, eluted in 5-10% MeOH/DCM to furnish compounds **15 a-c** (Yield 50 - 60%).

### **Receptor Assays**

All analogs were screened at 10  $\mu\text{M}$  in multi-well format for intrinsic (agonist) and antagonist activity at the human 5-HT<sub>2A</sub> receptor using FLIPR-based (Molecular Devices, Sunnydale, CA) functional assays that detect receptor-mediated mobilization of internal calcium with a calcium sensitive fluorescent dye. Compounds that showed no intrinsic activity in the functional assay and inhibited the increase in basal fluorescence elicited by the EC<sub>80</sub> of 5-HT by at least 50%, had their K<sub>e</sub> (apparent affinity in a functional assay) determined. K<sub>e</sub> values were determined by running an 8-point half-log 5-HT concentration response curve in the presence and absence of a single concentration of antagonist. EC<sub>50</sub> values were calculated for 5-HT (A) and 5-HT + test compound (A'), and these used to calculate the test compound K<sub>e</sub> using the formula:  $K_e = [L]/(DR-1)$ , where [L] equals the concentration of test compound in the assay and DR equals the dose ratio or A'/A. A similar set of assays was performed for the  $\alpha_{1A}$ -adrenergic receptor.

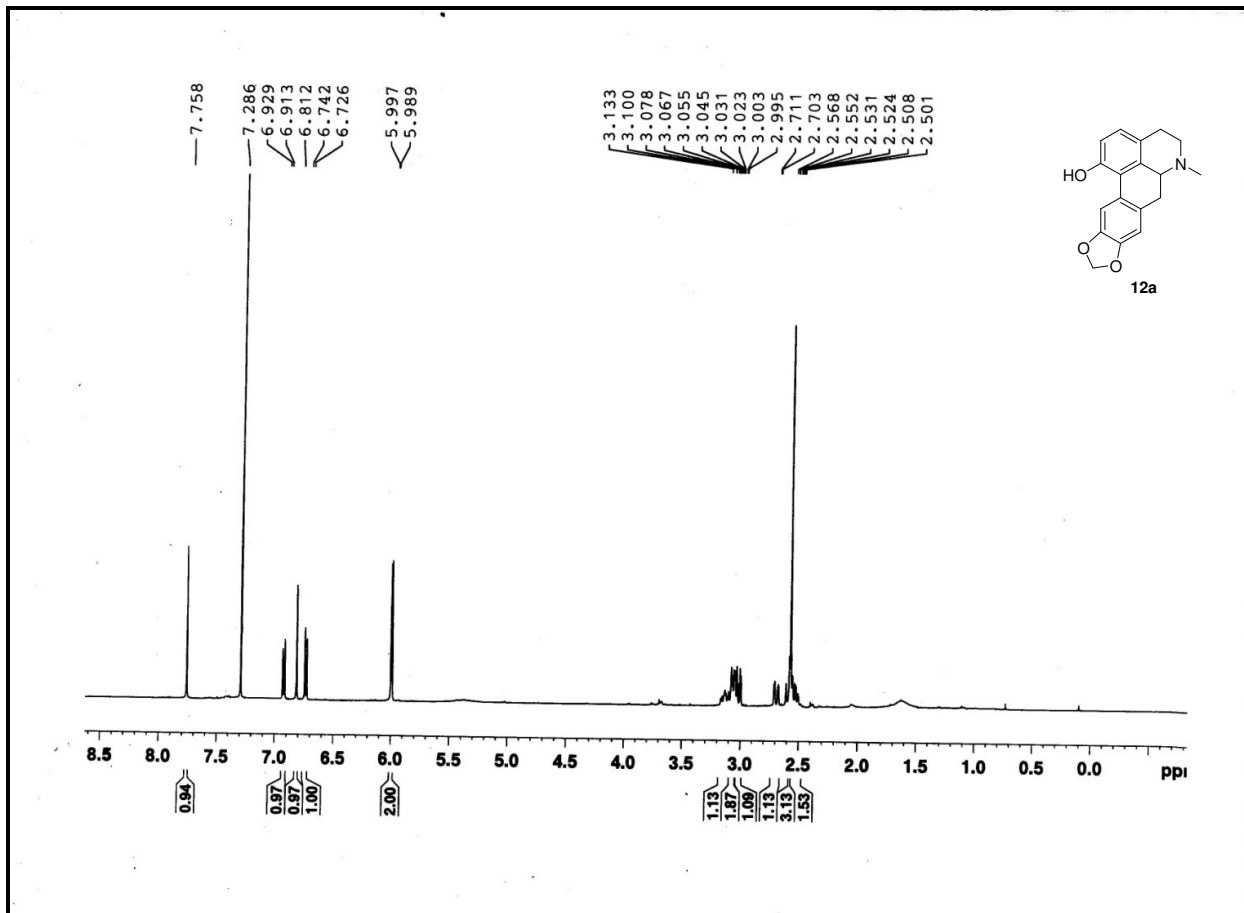

CARBON

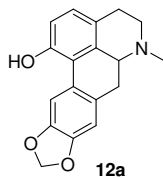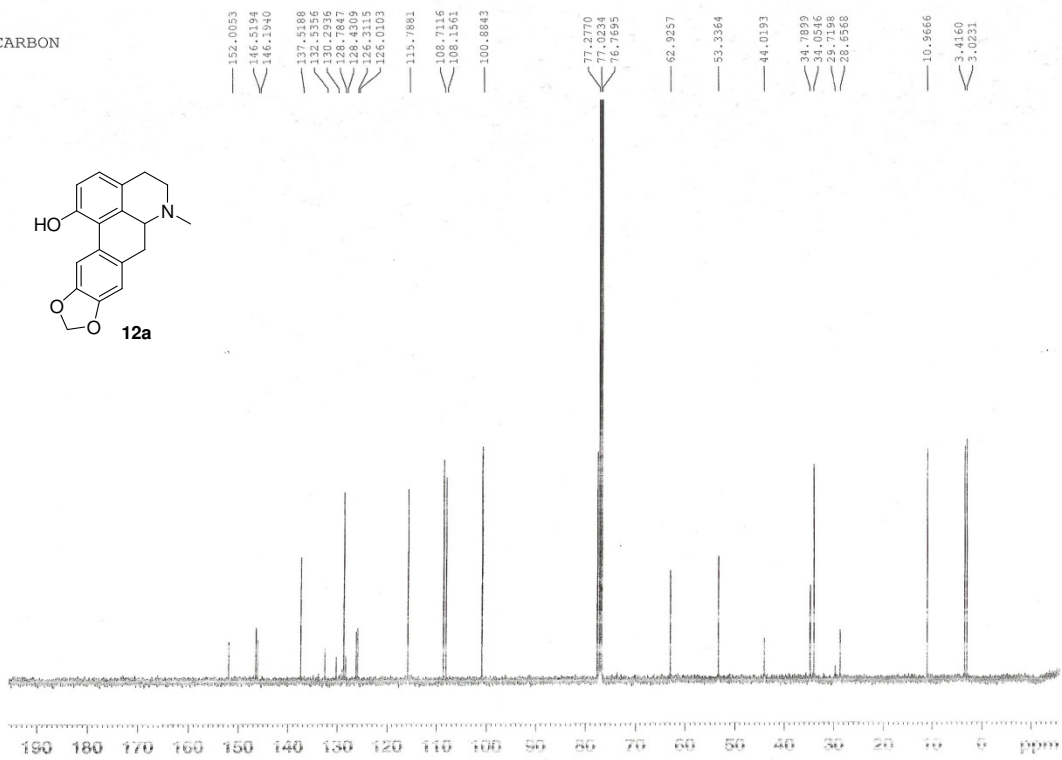



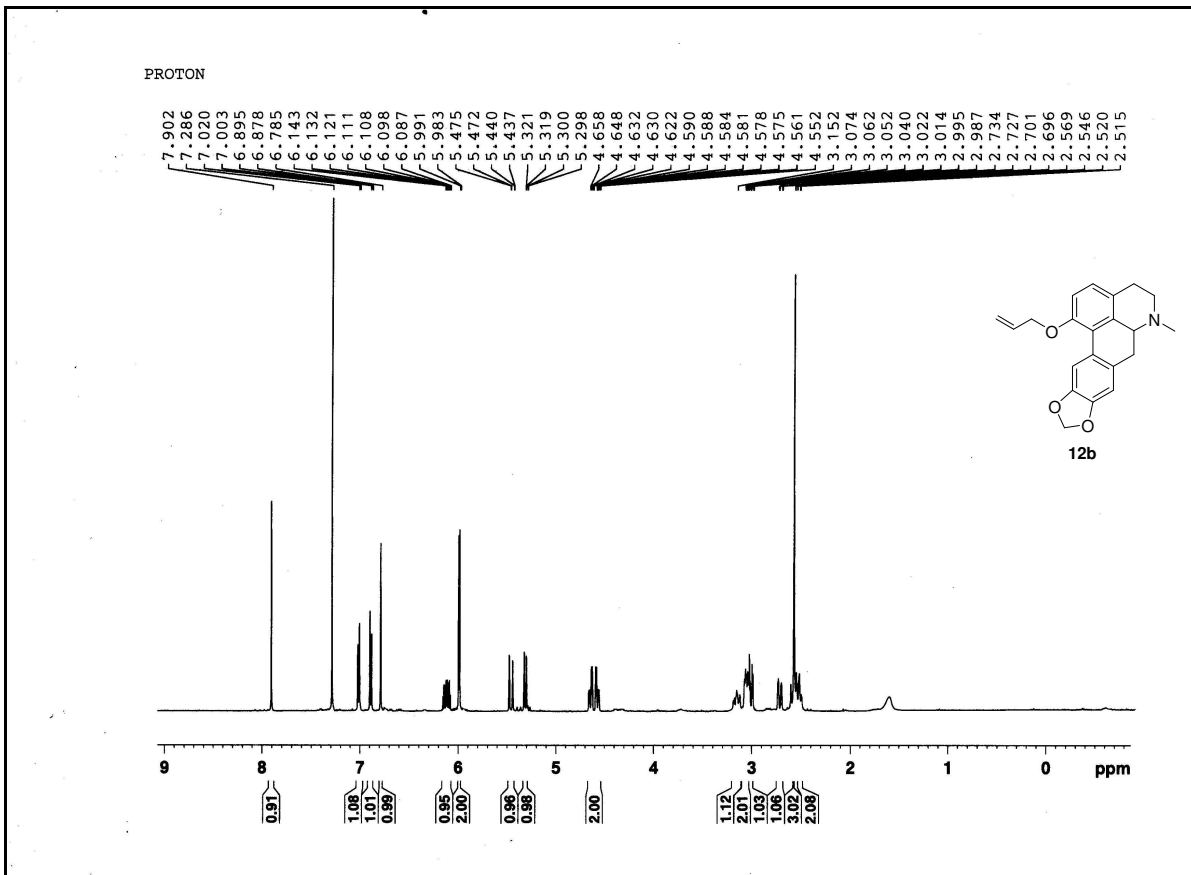

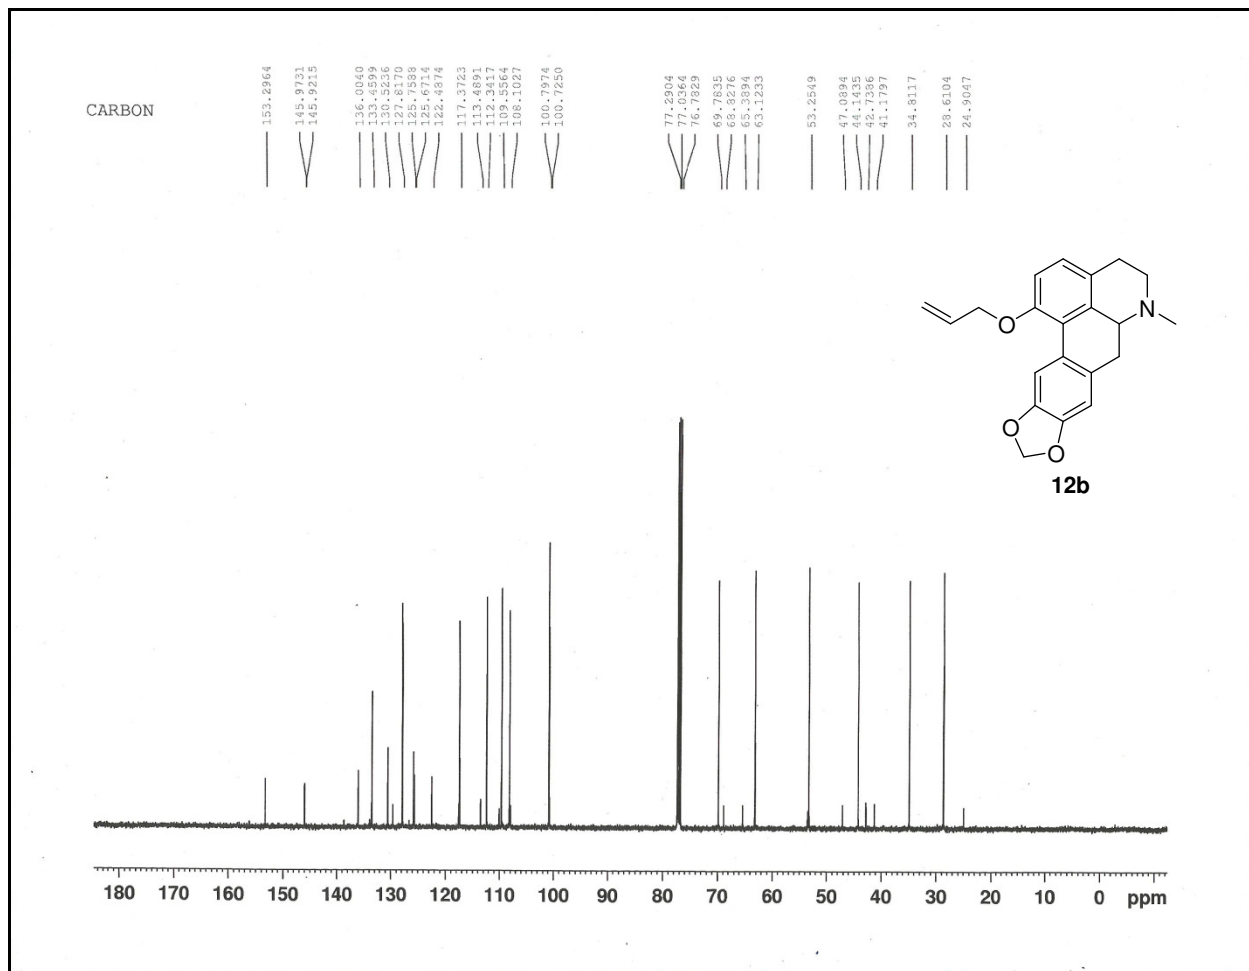

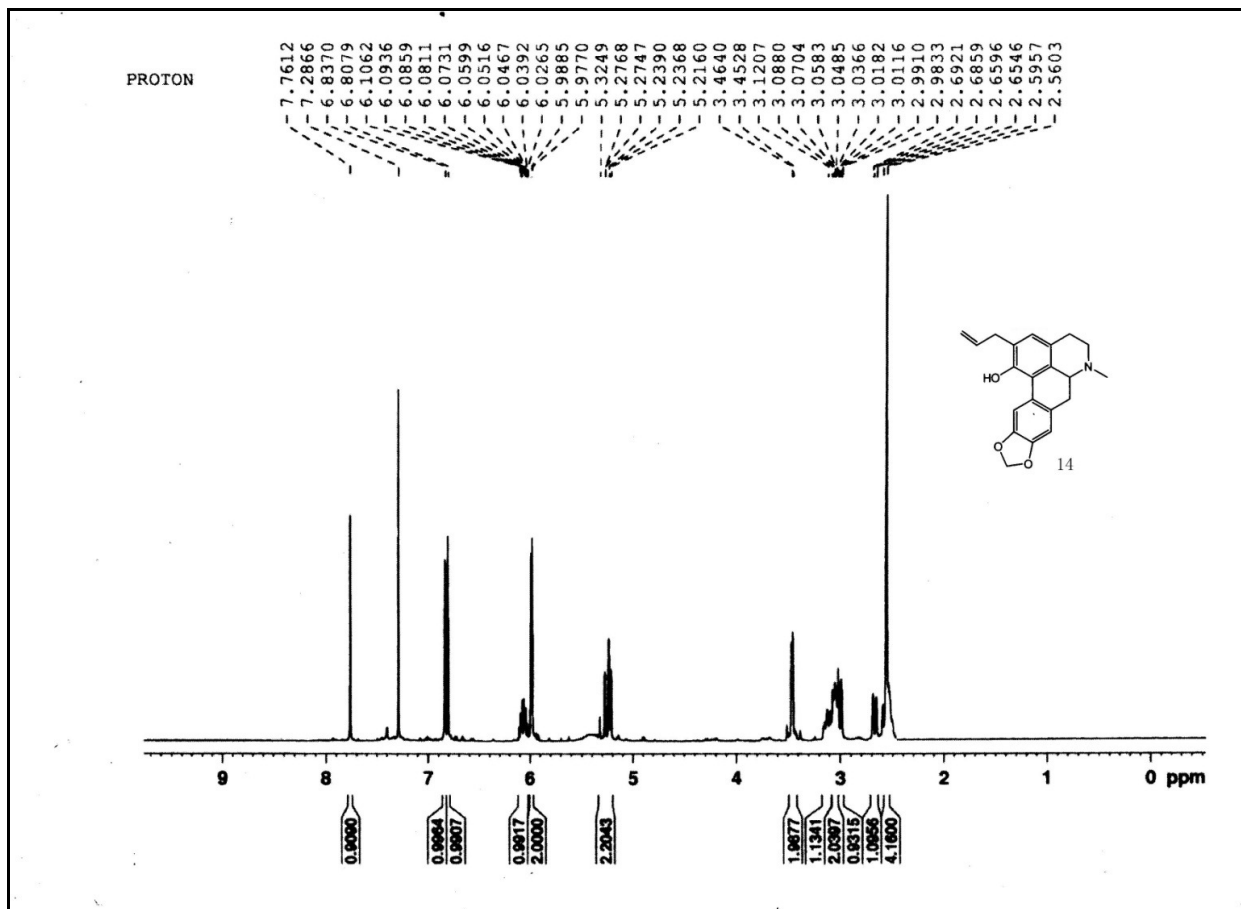

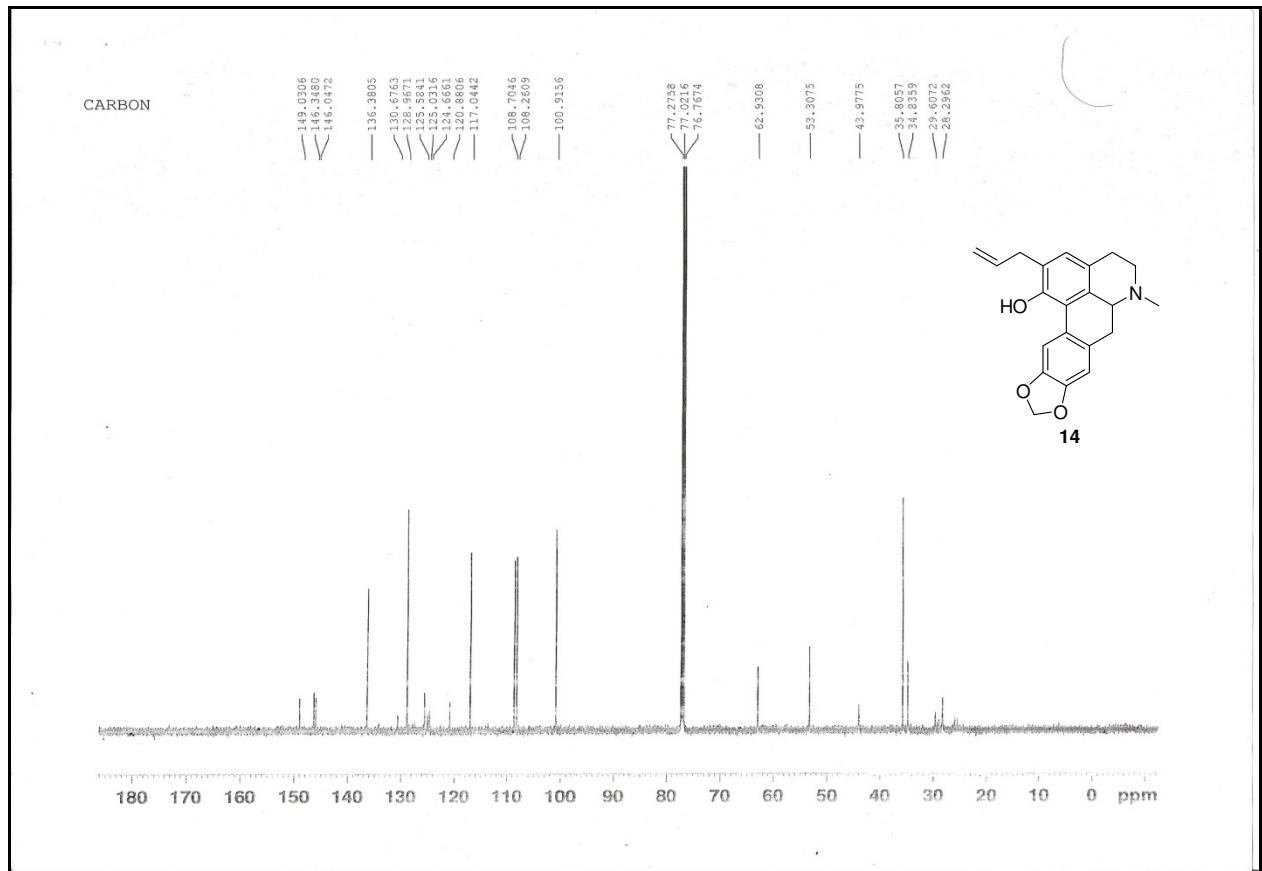

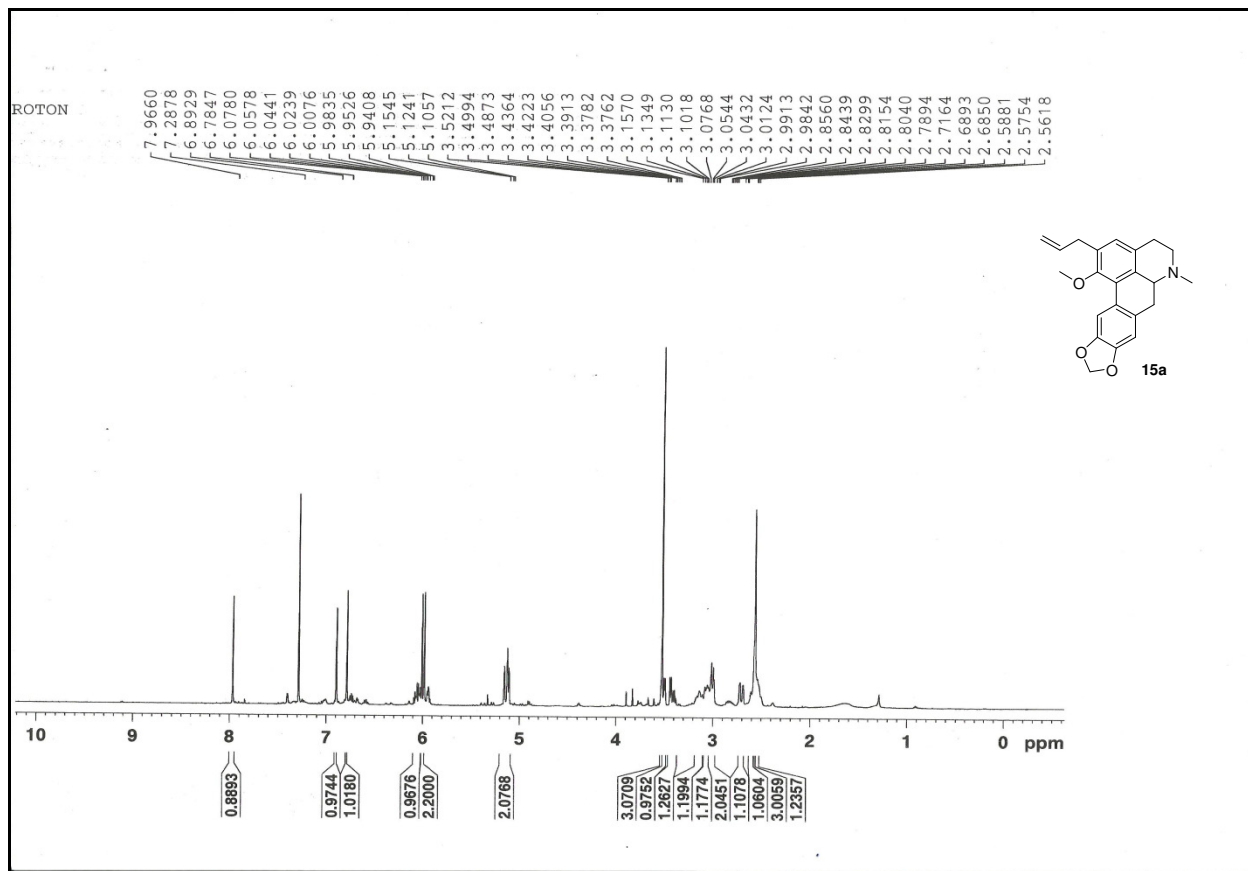

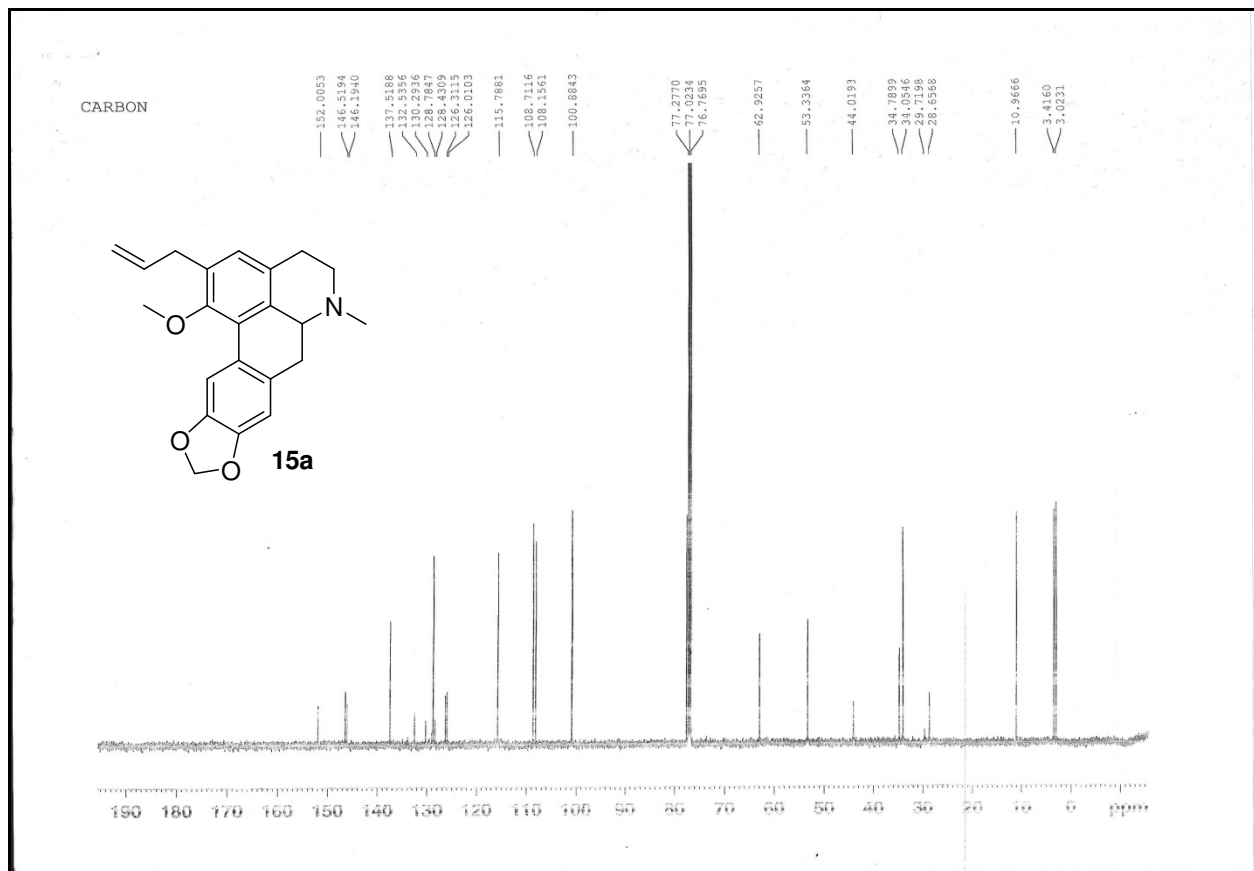

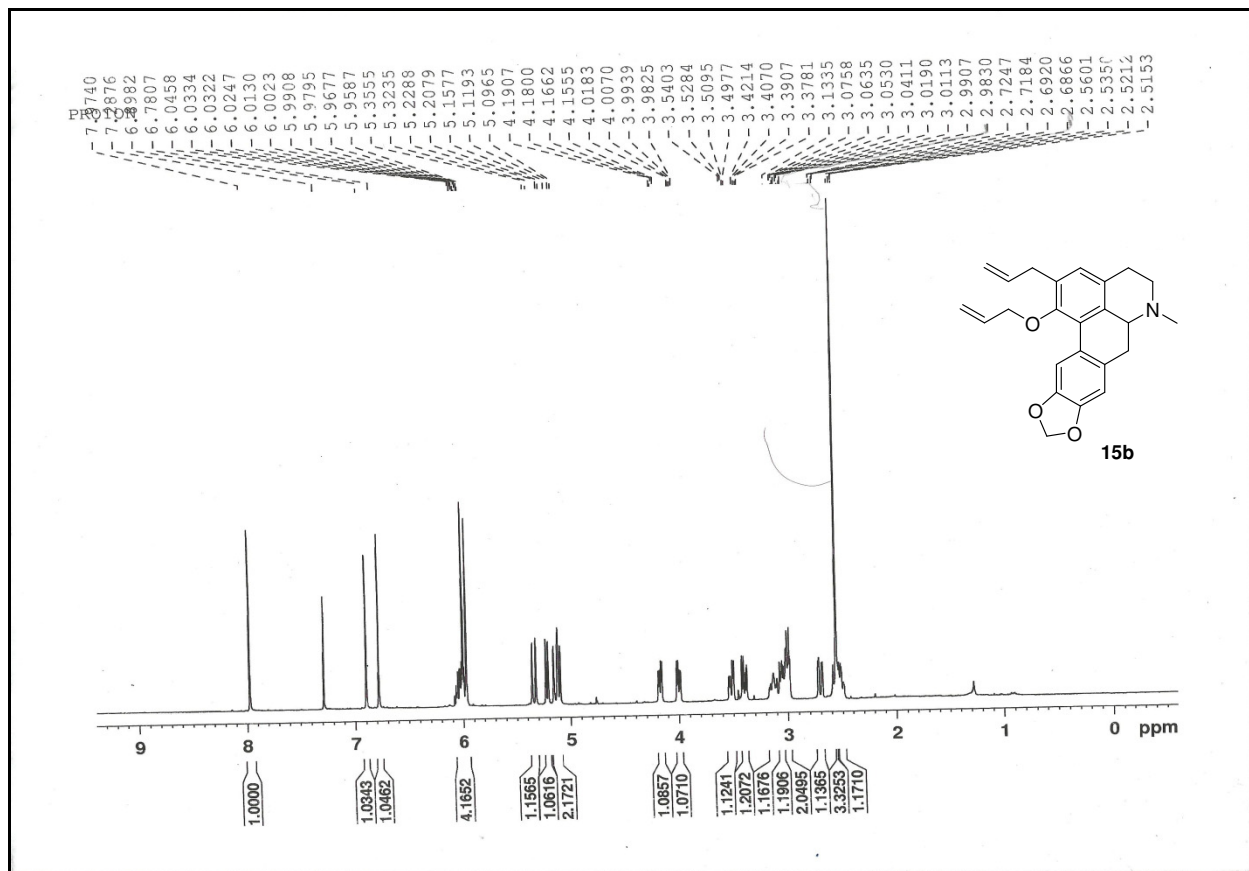

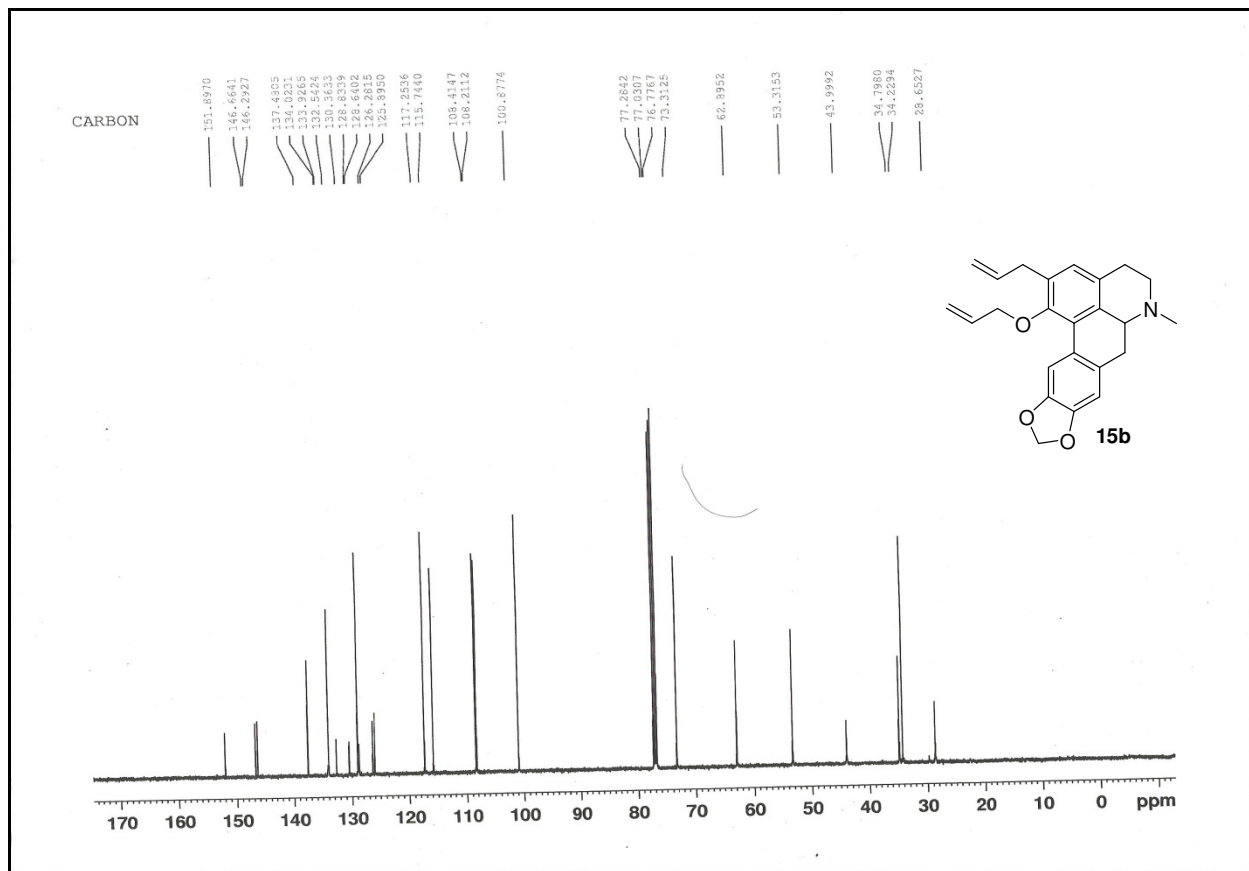



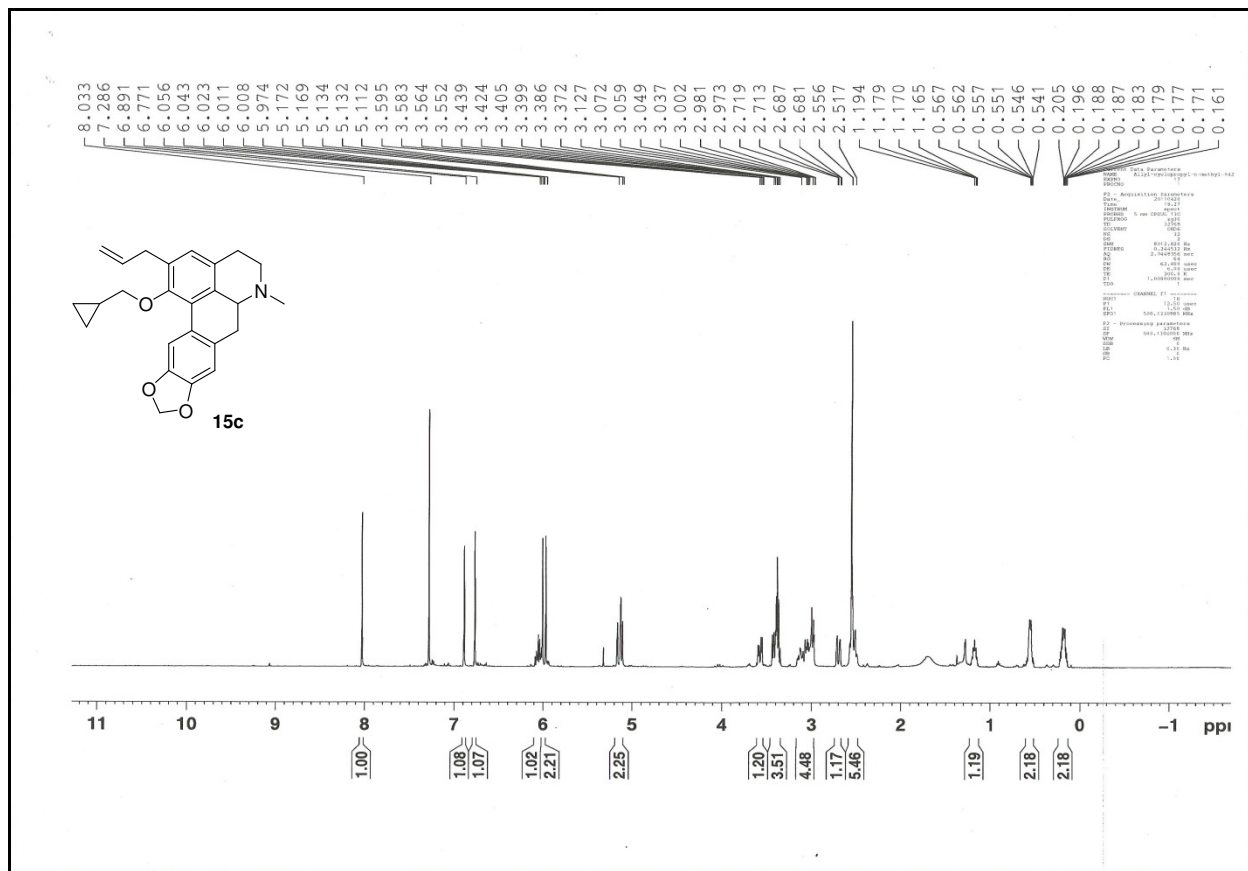

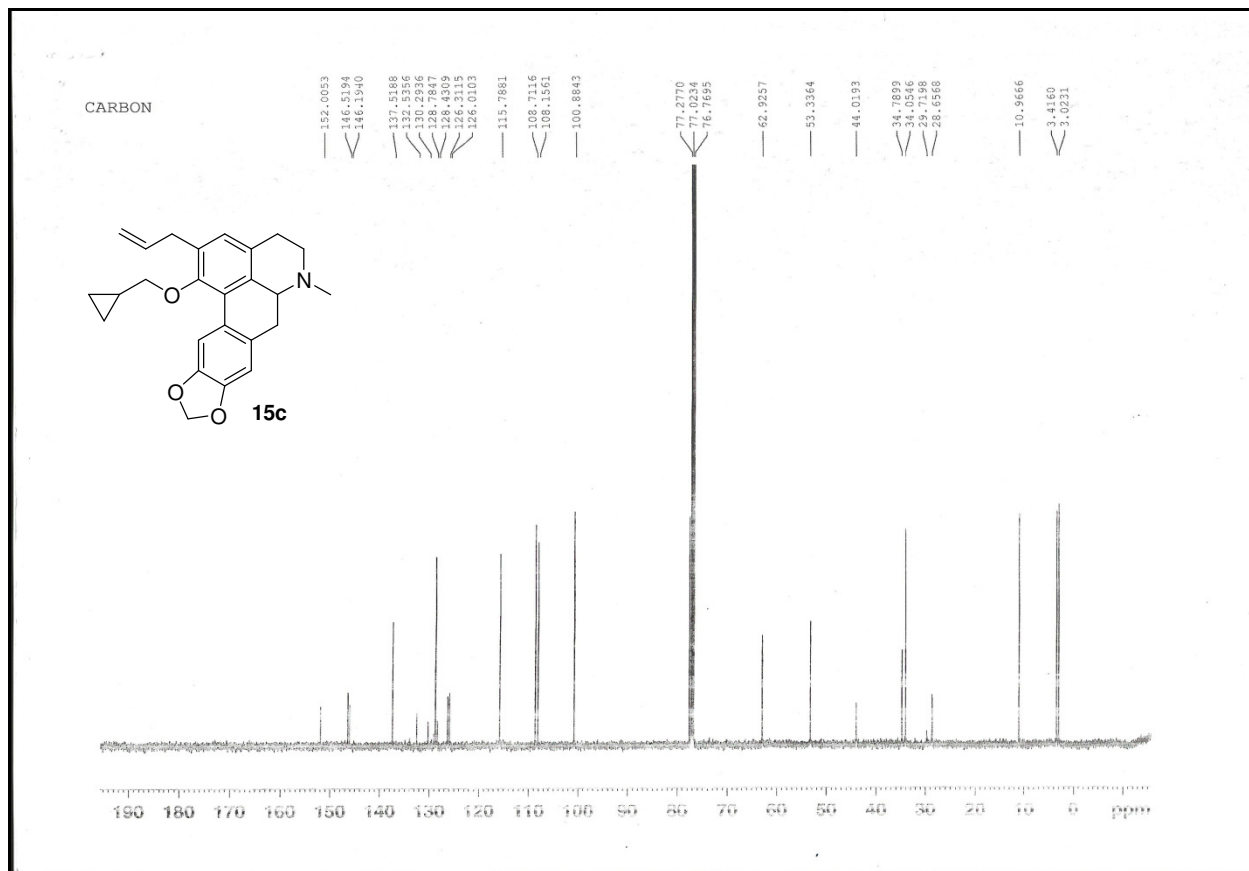

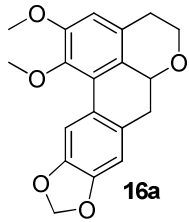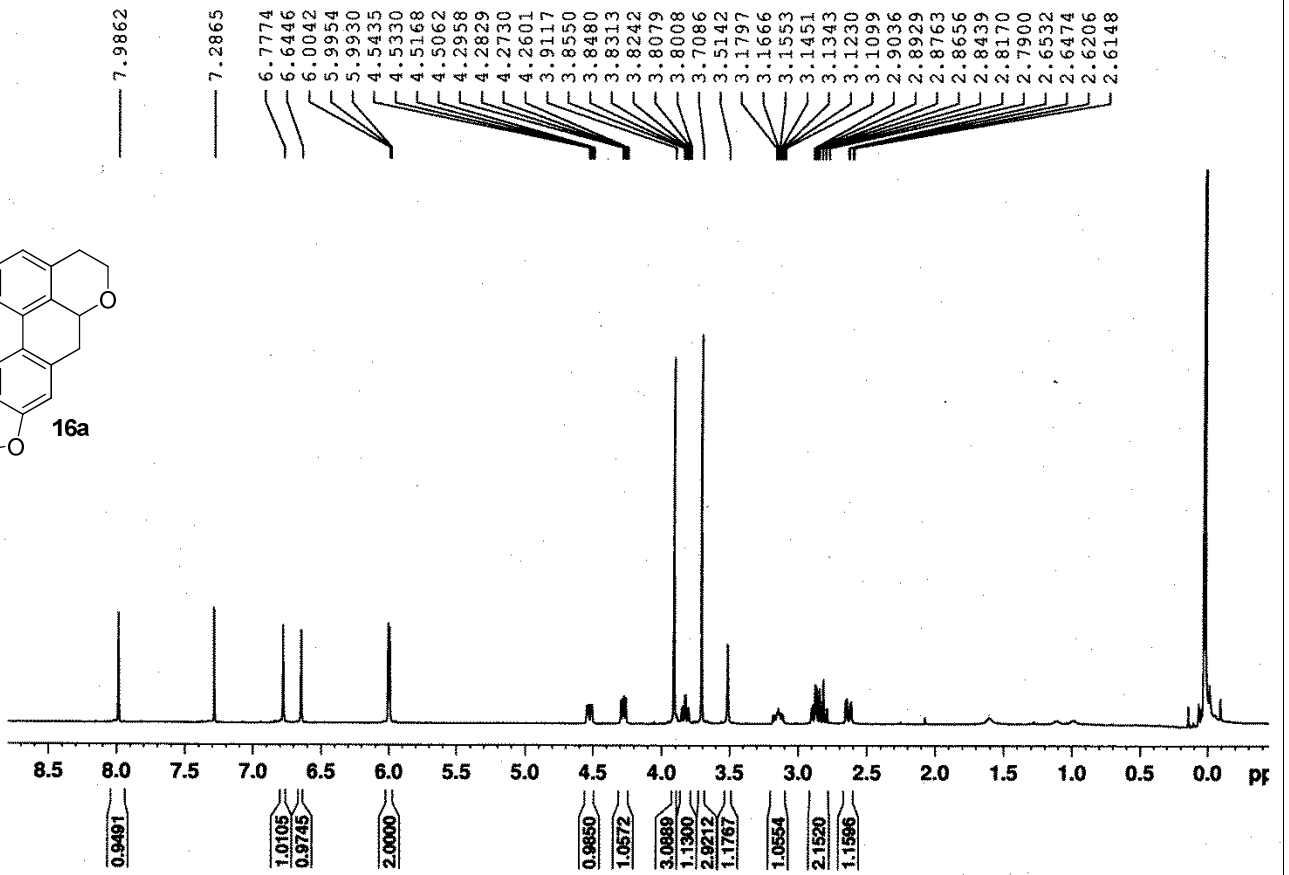

CARBON

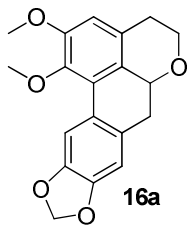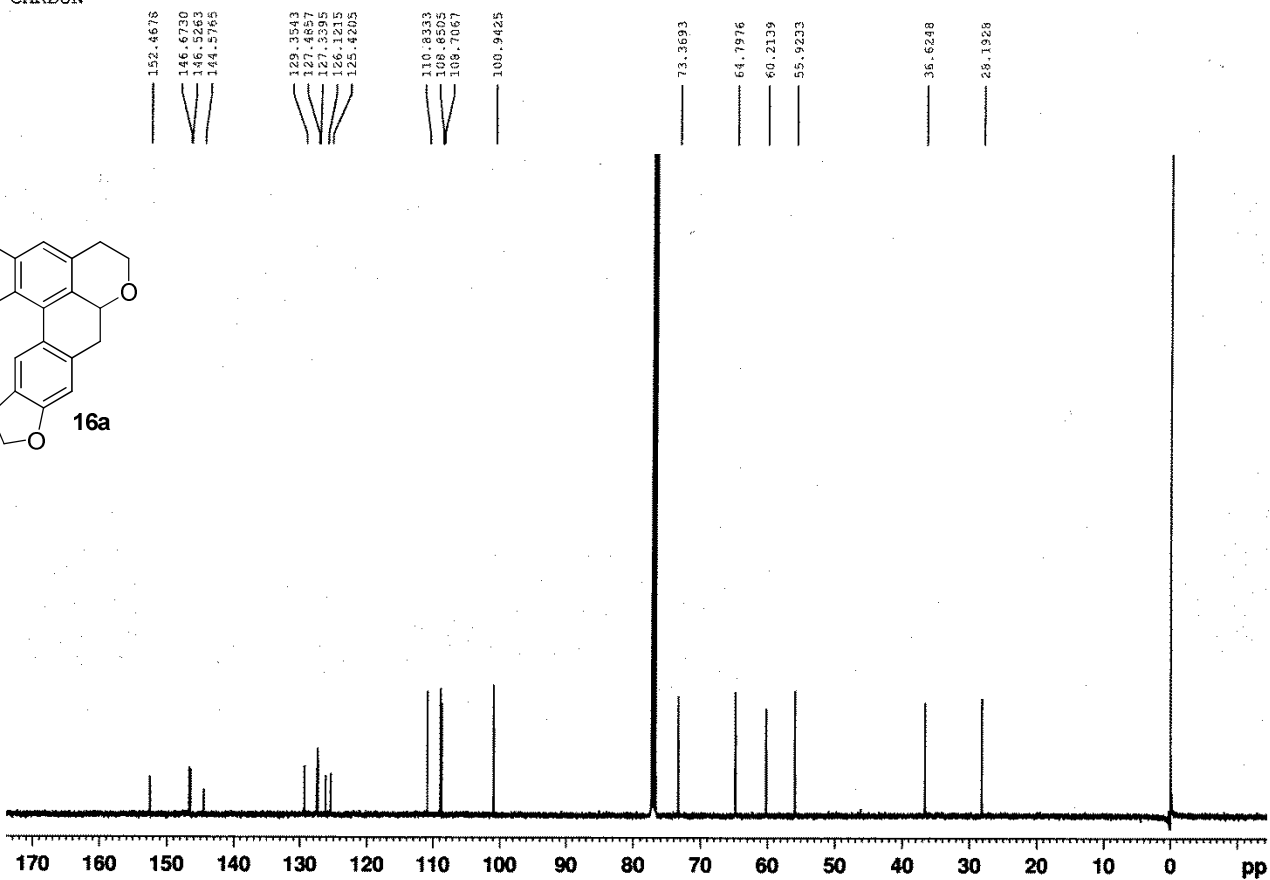

Proton

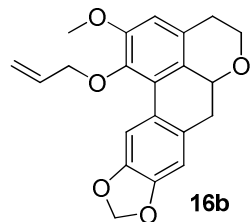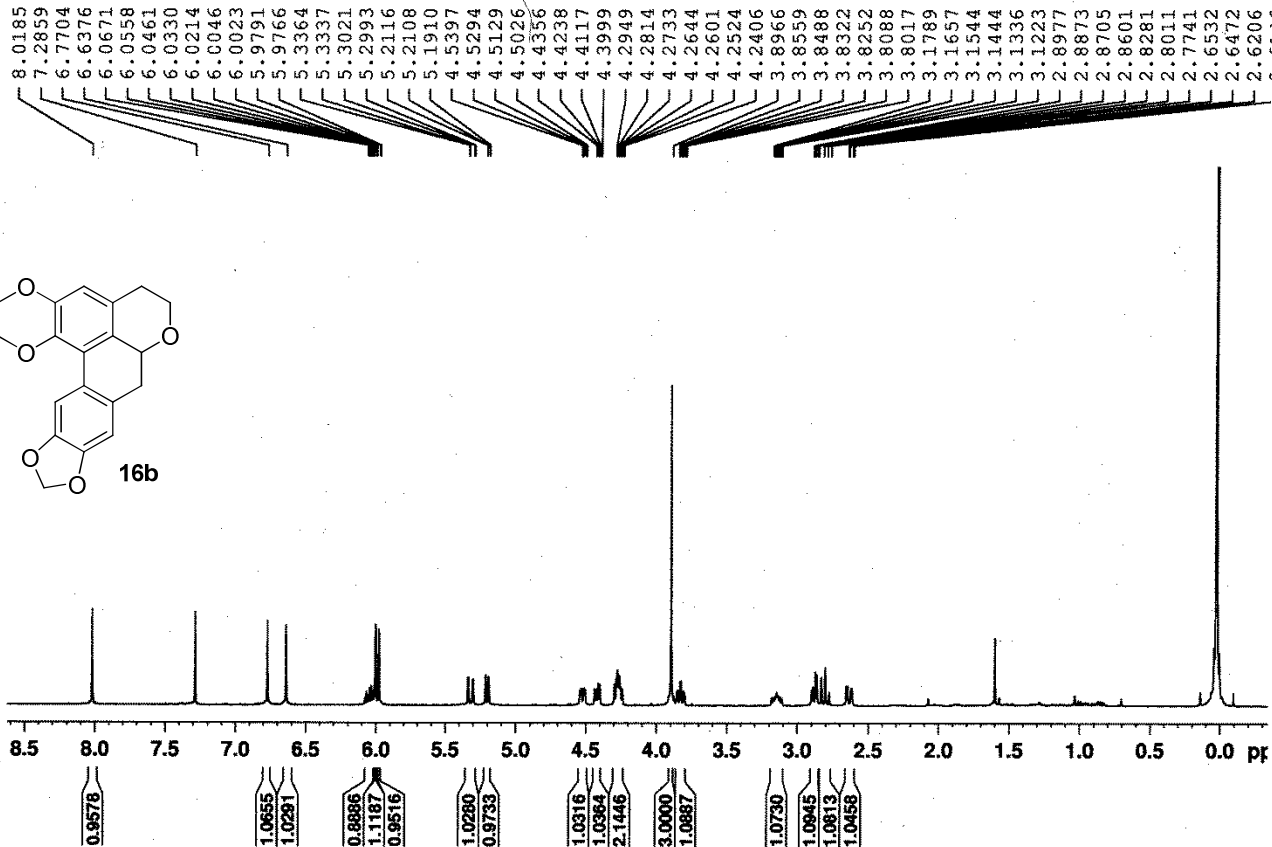

CARBON

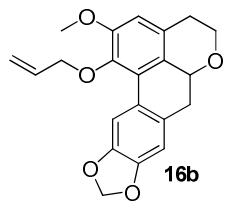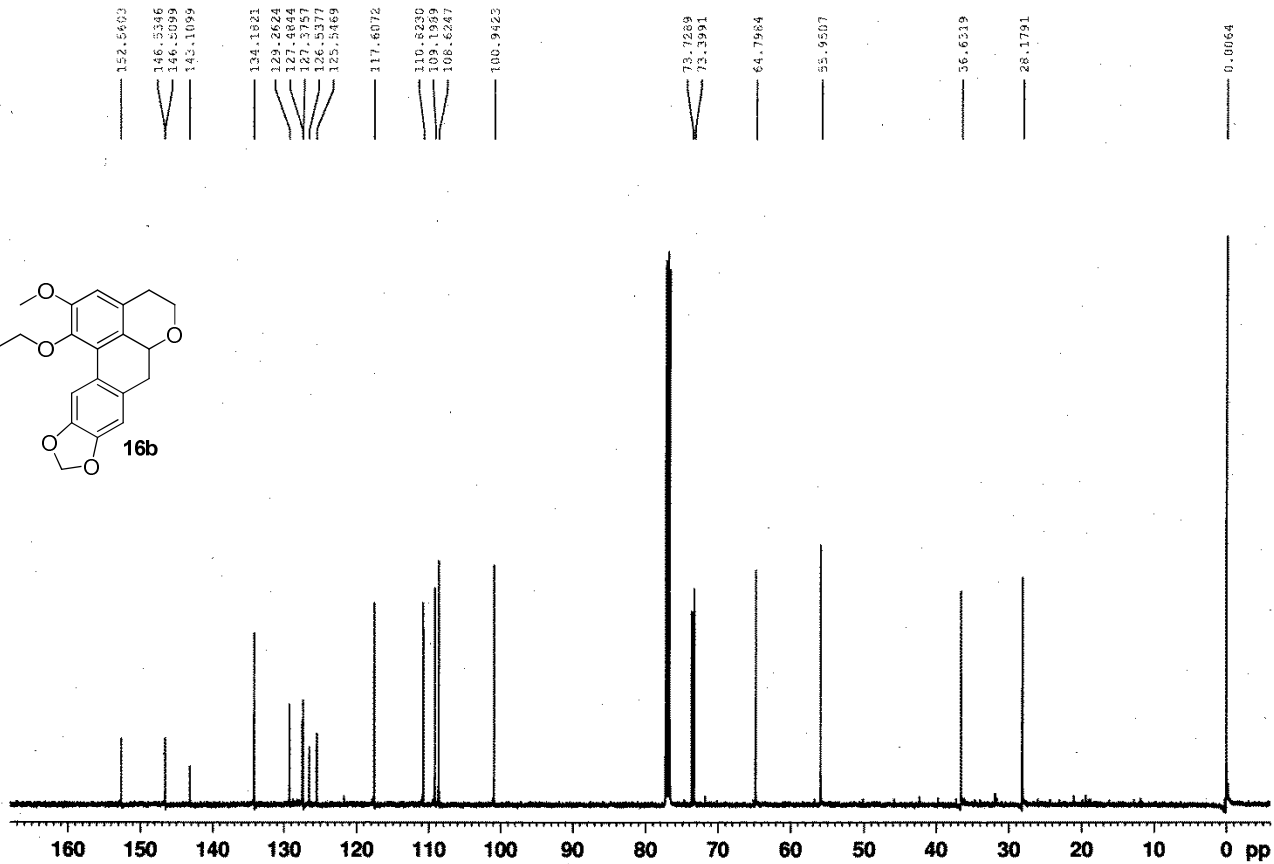

Supplement: NIHMS578248-supplement-01.pdf [file NIHMS578248-supplement-01.pdf]
